# Supplementary material for: Efficient pan-European river flood hazard modelling through a combination of statistical and physical models
Source: Copernicus journal article supplement (doi:10.5194/nhess-2017-4), 2017-01-05
Supplement: Supplementary file [file nhess-2017-4-AC1-supplement.pdf]

Statistics for the uncalibrated and calibrated model.

| Comparison with JRC model           | Uncalibrated |         | Calibrated  |         |
|-------------------------------------|--------------|---------|-------------|---------|
|                                     | Correct (%)  | Fit (%) | Correct (%) | Fit (%) |
| Sub-model                           |              |         |             |         |
| Central Europe                      | 82,0%        | 58,1%   | 82,0%       | 58,1%   |
| British Isles and Iberian peninsula | 78,7%        | 49,7%   | 78,7%       | 49,7%   |
| Southern Europe                     | 82,6%        | 49,7%   | 81,3%       | 49,8%   |
| Western Europe                      | 77,0%        | 51,9%   | 77,0%       | 51,9%   |
| Danube basin                        | 87,0%        | 54,8%   | 86,7%       | 54,9%   |
| North-eastern Europe                | 87,4%        | 64,8%   | 87,1%       | 64,8%   |
| Scandinavia                         | 89,6%        | 61,1%   | 87,5%       | 61,8%   |
| Comparison with local maps          |              |         |             |         |
| England                             | 77,7%        | 43,7%   | 77,7%       | 43,7%   |
| Saxony                              | 61,1%        | 29,2%   | 61,1%       | 29,2%   |
| Lower Austria                       | 60,5%        | 26,0%   | 59,6%       | 26,2%   |
